# Supplementary material for: Whole-exome sequencing identified mutational profiles of urothelial carcinoma post kidney transplantation
Source: Springer Nature journal article supplement (doi:10.1186/s12967-022-03522-4), 2022-07-21

(A)

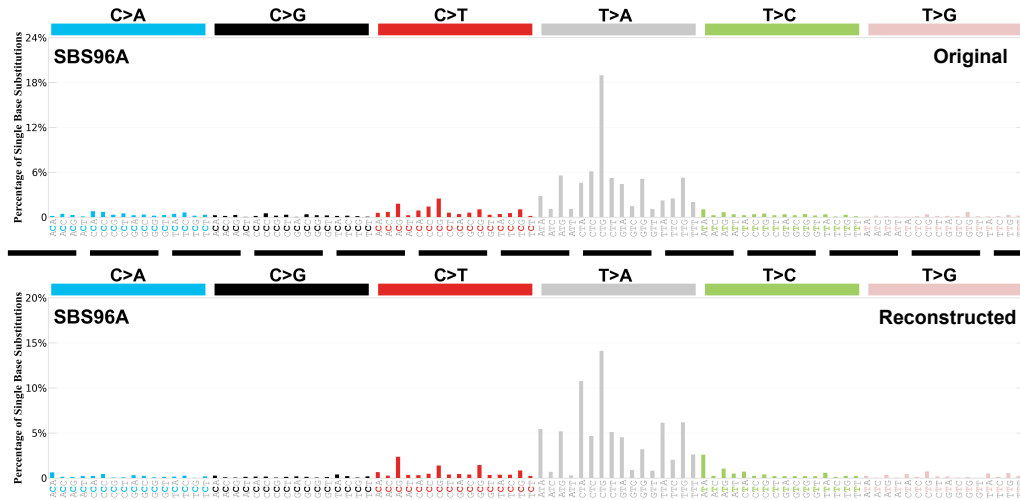

**Cosine Similarity: 0.914**    **L1 Error %: 43.0%**    **KL Divergence: 0.164**  
**Correlation: 0.895**    **L2 Error %: 40.726%**

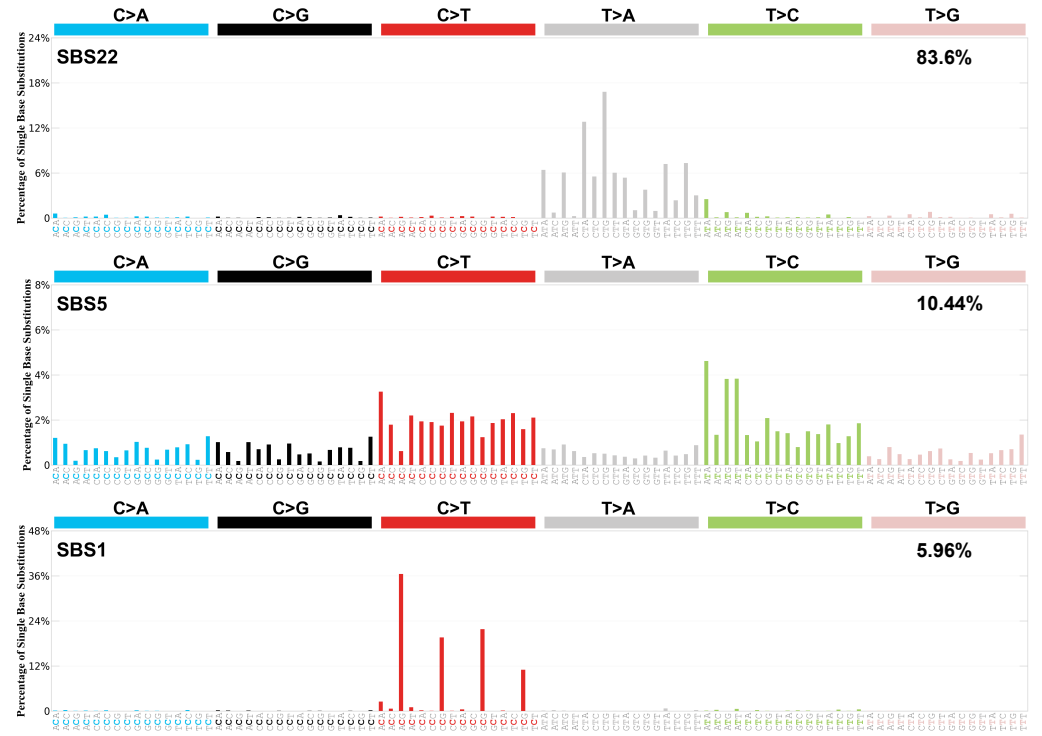

**(B)**

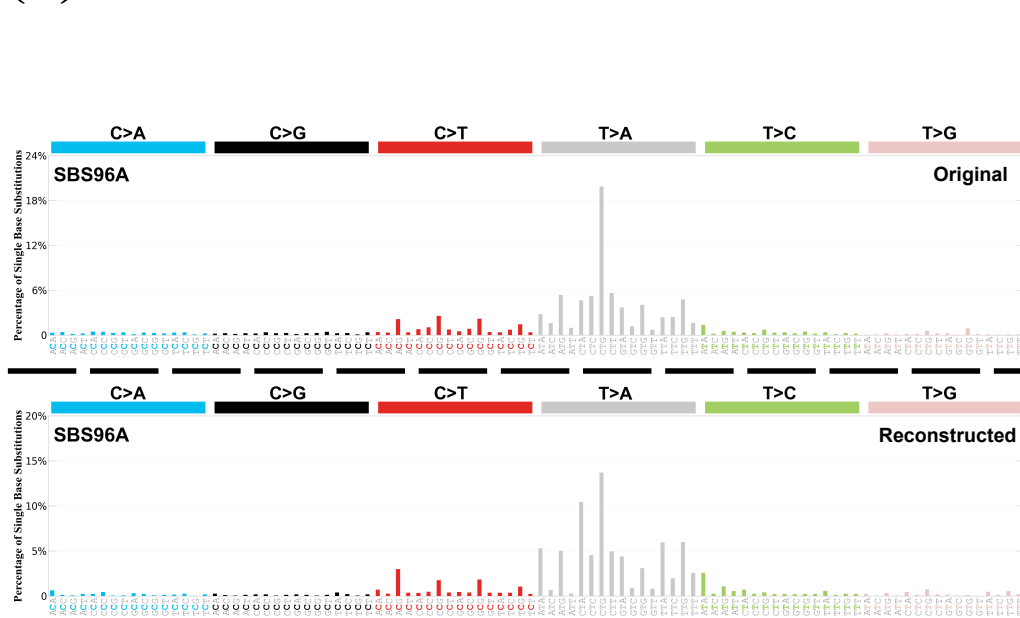

**Cosine Similarity: 0.912**    **L1 Error %: 42.0%**    **KL Divergence: 0.1416**  
**Correlation: 0.893**    **L2 Error %: 40.362%**

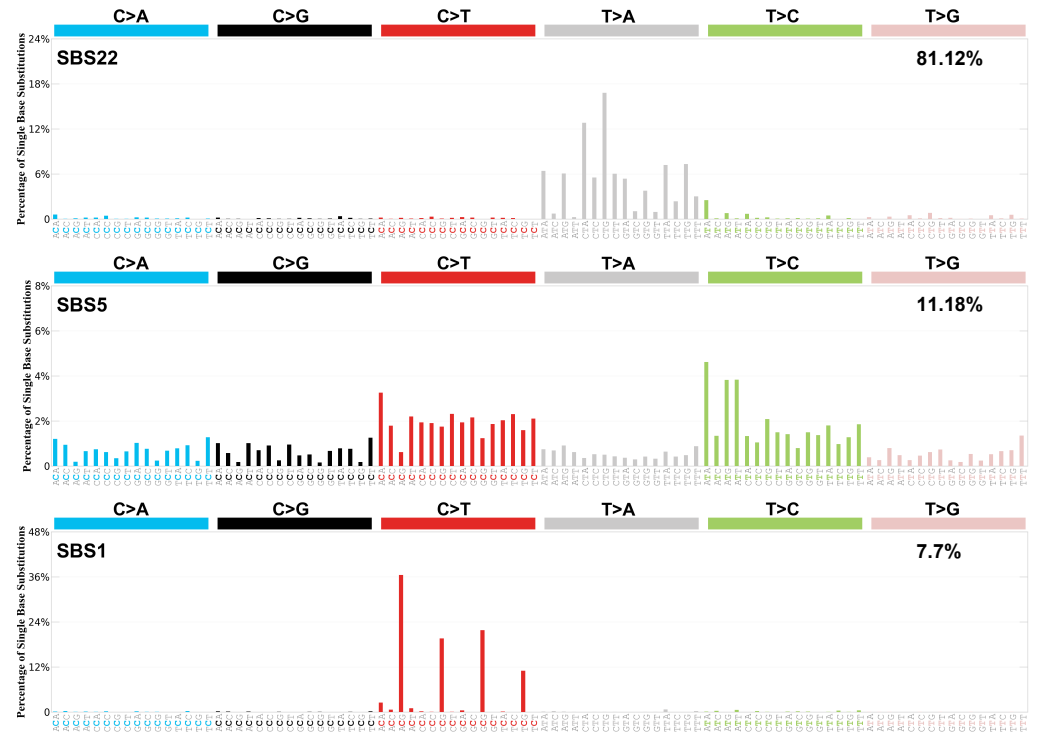

(C)

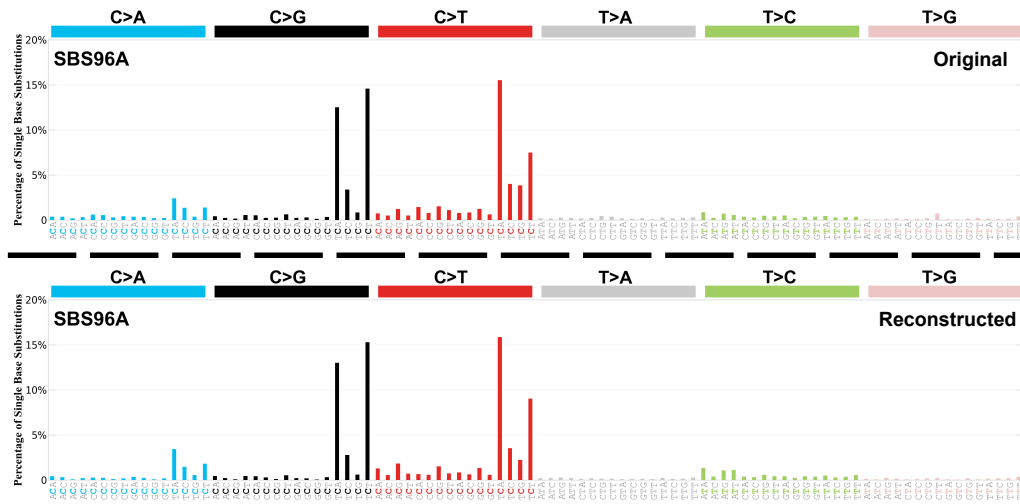

**Cosine Similarity: 0.994**   **L1 Error %: 18.0%**   **KL Divergence: 0.0428**  
**Correlation: 0.993**   **L2 Error %: 11.037%**

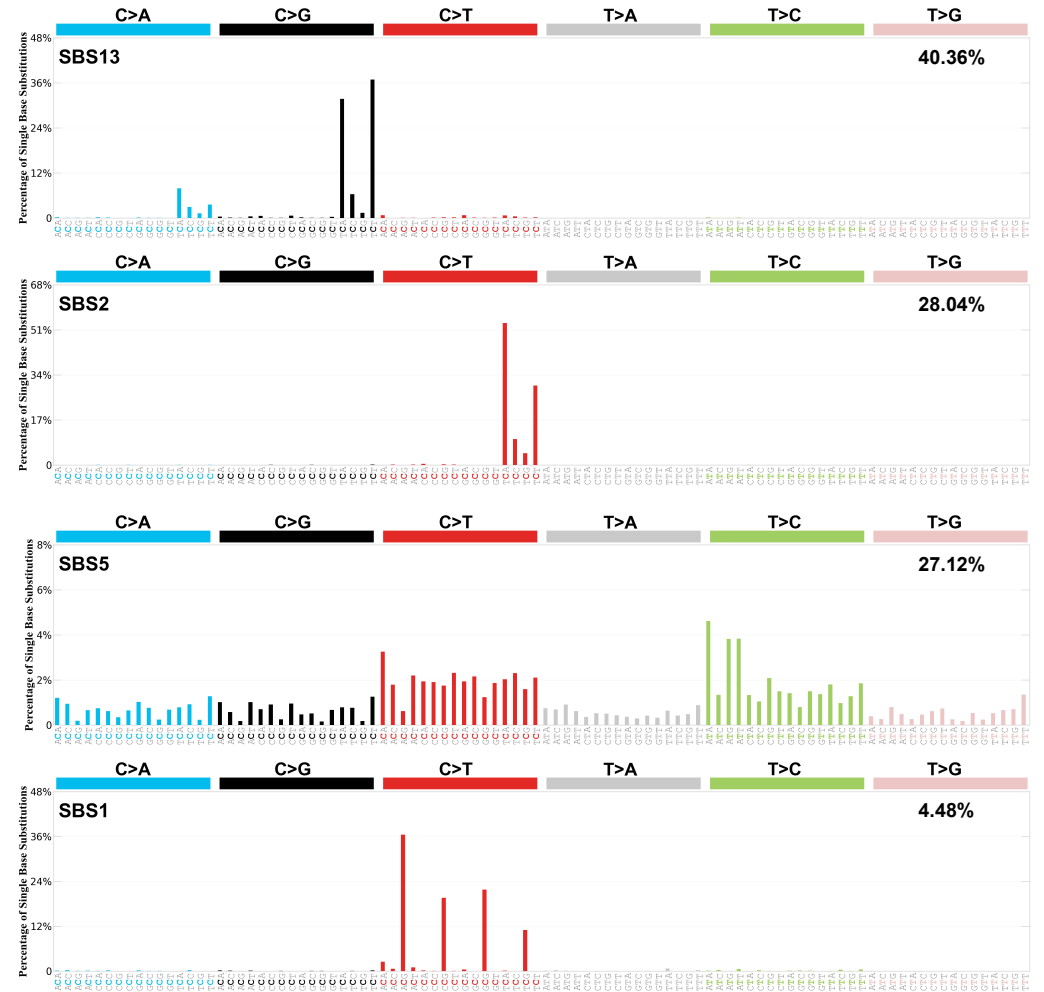

Supplement: MOESM1 [file 23291216]
